# Supplementary material
Source: PubMed Central journal article supplement (PMC5612396)

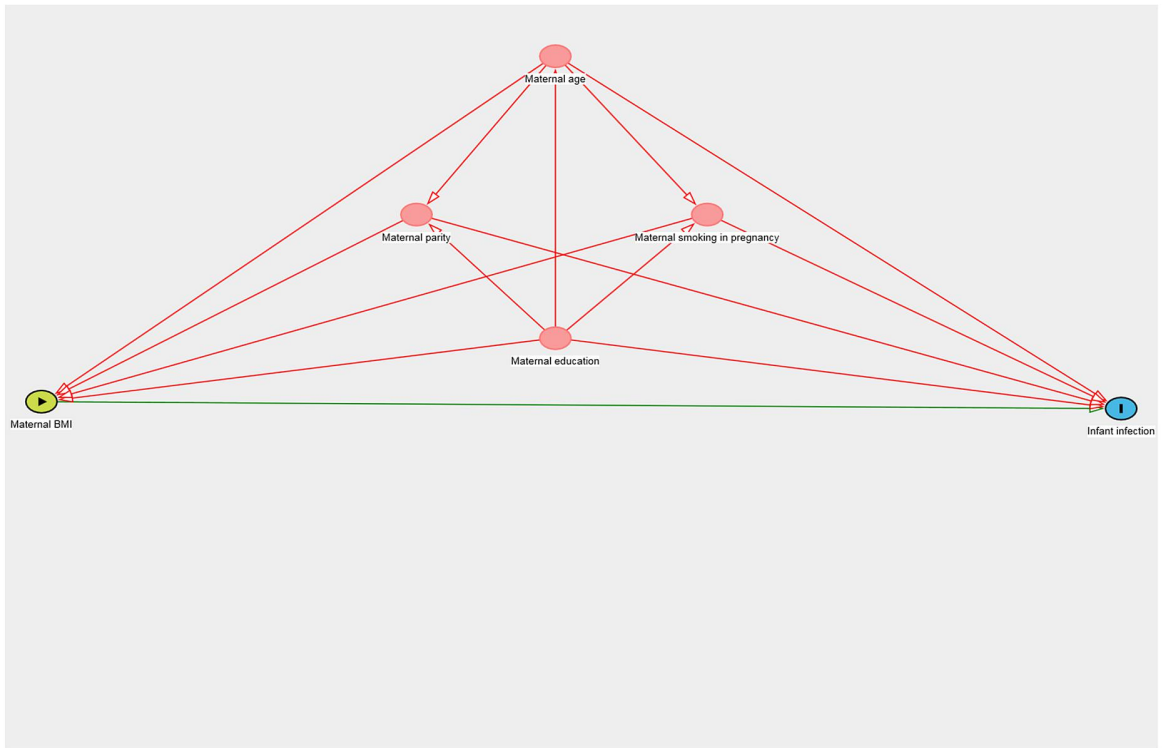

Supplement: NIHMS73873-supplement-Figure_S1a.pdf [file NIHMS73873-supplement-Figure_S1a.pdf]

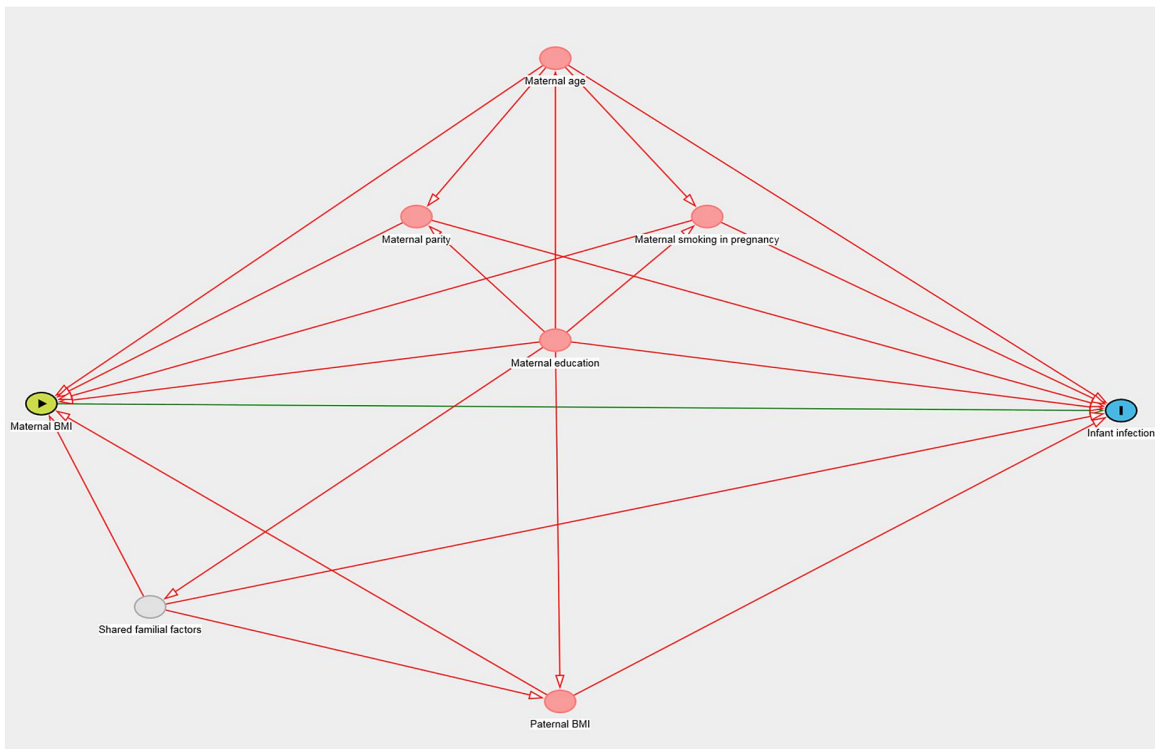

Supplement: NIHMS73873-supplement-Figure_S1b.pdf [file NIHMS73873-supplement-Figure_S1b.pdf]
